# Supplementary material for: Establishment of a Jaw Fibrosarcoma Patient-Derived Xenograft and Evaluation of the Tumor Suppression Efficacy of Plumbagin Against Jaw Fibrosarcoma
Source: Front Oncol. 2020 Aug 27;10:1479. doi: 10.3389/fonc.2020.01479 (PMC7481444; doi:10.3389/fonc.2020.01479)
Supplement: Supplementary file 1 [file Table_1.xlsx]

## Sheet: Sheet2
Body weight changes of nude mice
Group		Blank control								CDDP								PLB								CDDP+PLB
Number Weight(g) Time(d)		T177	T146	T275	T285	T295	T143	T283	T317	T093	T323	T025	T195	T280	T286	T296	T276	T145	T149	T190	T271	T188	T272	T357	T319	T293	T179	T148	T141	T284	T184	T518	T325
0		26.2	28.2	23.3	27.1	18.9	29.1	26.1	24.6	24.7	25	23.7	28.7	23.7	23.7	18.6	20.4	26.7	28.7	24.6	21.5	24.6	21.6	23.4	23.4	21.8	28	24.2	27.9	24.4	31.4	24.6	24.6
3		25.7	26.9	23.4	27.3	19.7	26.9	26.1	24.7	23.9	24.9	23.1	28	22.7	23.9	17.5	19.8	26.1	28.3	24.6	19.6	22.9	21.4	22.9	23.4	20.1	26.5	23.1	26.3	22.6	28.3	22.9	24.1
6		26.3	27.3	23.1	26.9	19.9	28.1	25.8	24.2	23.8	25.2	23	29.6	19.2	23.8	17.6	20.2	25.2	27.4	24.6	20.1	23	20.2	22.3	23.1	18.3	24.2	21.8	24.8	21.1	27.3	22.4	23.2
9		26.1	26.9	23.2	28.4	20.2	28	26.1	24.4	24.1	25.2	23.2	29.8	19.4	23.3	17.7	19.9	24.6	27.1	24.1	20.4	23.4	19.2	22.1	22.1	19.1	24.1	21.5	23.4	21.1	26.7	22.1	22.1
12		25.8	27	23.5	29.9	20.3	28.2	26.2	23.4	24.4	25.5	22.9	30.2	20	23.4	17.6	19.8	24.7	26.6	23.1	20.8	23.6	18.8	21.4	21.6	19	24.3	20.2	22.8	20.4	25.8	21.6	20.4
15		25.7	27	23.3	27.9	20.4	28.3	25.3	24.4	23.3	25.5	22.9	30.2	21.1	24.3	17.8	19.1	24	25.6	23.2	20.5	23.4	18.8	21.4	20.7	19	23.6	19.1	22.9	20.2	24.5	21.4	21.5
18		26.2	27.4	22.9	27.4	20.2	28.6	25.2	24.4	22.8	26.4	23.7	30.3	21.8	23.2	17	19.6	23.9	25.8	23.6	20.5	24.4	20.7	20.5	20.5	18.9	23.9	18	21.8	20.6	23.9	19.9	21
21		26	27.2	23.5	27.1	20.4	28.4	26.3	24.7	23.2	25.8	23.1	29.3	22.3	23.5	16.5	18.6	24.1	26.5	23.5	20.3	24.1	20.2	20.6	19.3	19.1	21.6	17.8	21.3	19.3	23.5	20.2	20.4
24		26.8	27.5	23.6	26.4	20.4	28	26.9	24.6	23.1	25.8	23.1	29	22.1	23.6	16	18.5	24.2	26.6	23.2	20.1	23.9	20.4	20.9	18.7	19.3	21.9	17.5	21.2	18.9	23.7	20.7	19.8
27		25.6	27.1	23.3	26.2	20.1	26.8	26.4	24.4	23.1	23.6	23.4	30.2	22.4	23.6	16.2	18.3	23.9	27.7	23.7	20.7	24.4	21.2	21.8	20.2	18.4	21.5	17	21	20.1	23.2	21.1	20
